# Supplementary material
Source: PubMed Central journal article supplement (PMC7745181)
Supplement: NEJMoa2034577_research-summary.pdf [file NEJMoa2034577_research-summary.pdf]

RESEARCH SUMMARY

# Safety and Efficacy of the BNT162b2 mRNA Covid-19 Vaccine

F.P. Polack, et al. DOI: 10.1056/NEJMoa2034577

**CLINICAL PROBLEM**

Safe and effective vaccines to prevent severe acute respiratory syndrome coronavirus 2 (SARS-CoV-2) infection and Covid-19 are urgently needed. No vaccines that protect against betacoronaviruses are currently available, and mRNA-based vaccines have not been widely tested.

**CLINICAL TRIAL**

A randomized, double-blind study of an mRNA vaccine encoding the SARS-CoV-2 spike protein.

43,548 participants ≥16 years old were assigned to receive the vaccine or placebo by intramuscular injection on day 0 and day 21. Participants were followed for safety and for the development of symptomatic Covid-19 for a median of 2 months.

**RESULTS**

**Safety:**

Vaccine recipients had local reactions (pain, erythema, swelling) and systemic reactions (e.g., fever, headache, myalgias) at higher rates than placebo recipients, with more reactions following the second dose. Most were mild to moderate and resolved rapidly.

**Efficacy:**

The vaccine showed some early protection 12 days after the first dose; 7 days after the second dose, 95% efficacy was observed.

**LIMITATIONS AND REMAINING QUESTIONS**

Further study is required to understand the following:

- Safety and efficacy beyond 2 months and in groups not included in this trial (e.g., children, pregnant women, and immunocompromised persons).
- Whether the vaccine protects against asymptomatic infection and transmission to unvaccinated persons.
- How to deal with those who miss the second vaccine dose.

**Links:** Full article | NEJM QuickTake | Editorial

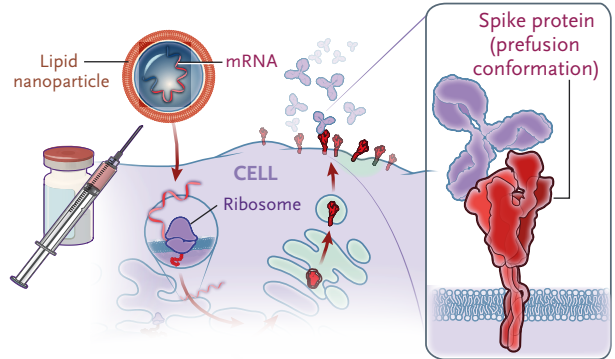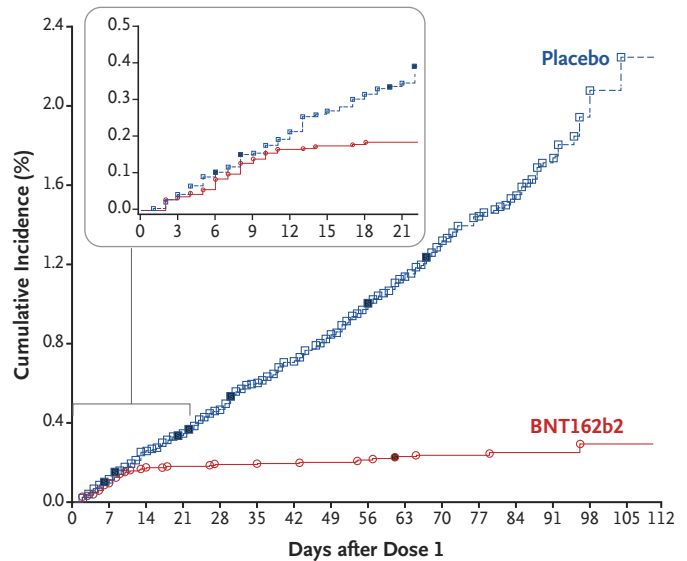

|                      | BNT162b2 Vaccine | Placebo |
|----------------------|------------------|---------|
| Symptomatic Covid-19 | 8                | 162     |
|                      | N=18198          | N=18325 |
| Severe Covid-19      | 1                | 9       |
|                      | N=21669          | N=21686 |

**Vaccine efficacy of 95% (95% credible interval, 90.3–97.6%)**

**CONCLUSIONS**

Two doses of an mRNA-based vaccine were safe over a median of two months and provided 95% protection against symptomatic Covid-19 in persons 16 years of age or older.
